# Supplementary material for: Constructing Ni/MoN heterostructure nanorod arrays anchored on Ni foam for efficient hydrogen evolution reaction under alkaline conditions
Source: Royal Society of Chemistry journal article supplement (doi:10.1039/d1se01283e), 2021-01-01
Supplement: d1se01283e1.pdf [file d1se01283e1.pdf]

***Supporting Information (SI) for:***  
***Constructing Ni/MoN Heterostructure Nanorod Arrays***  
***Anchored on Ni Foam for Efficient Hydrogen***  
***Evolution Reaction under Alkaline Condition***

**Jian-Hang Sun, Fei-Fan Guo\*, Xuan-Yi Li, Jin Yang and Jian-Fang Ma\***

*Key Laboratory of Polyoxometalate and Reticular Material Chemistry of Ministry of Education, Faculty of Chemistry, Northeast Normal University, 5628 Renmin Street, Changchun 130024, China*

## **Experimental**

### 1. Synthesis of NiMoO<sub>4</sub>@NF nanorods

The NiMoO<sub>4</sub> nanorods were hydrothermally grown on Ni foam (NiMoO<sub>4</sub>@NF) according to the literature method<sup>[1]</sup>. Typically, Ni(NO<sub>3</sub>)<sub>2</sub>·6H<sub>2</sub>O (0.35 g, 1.2 mmol) and NaMoO<sub>4</sub>·2H<sub>2</sub>O (0.32 g, 1.3 mmol) were dissolved in 30 mL deionized water and stirred until a transparent solution was achieved. The Ni foam was cut into 4×2 cm<sup>2</sup> pieces and cleaned in 3 M HCl solution and deionized water successively. The resulting solution was transferred into a 50 mL Teflon-lined stainless-steel autoclave. Then the Ni foam was soaked in the solution. The autoclave was heated at 150 °C and kept 6 h. After the reaction, the solution was removed, and the Ni foam was washed with ethanol and dried to obtain NiMoO<sub>4</sub>@NF nanorods.

### 2. Synthesis of heterostructural Ni–MoN on Ni foam (Ni–MoN@NF)

Three pieces of the obtained 4×2 cm<sup>2</sup> NiMoO<sub>4</sub>@NF nanorods were placed in a tube furnace, and 0.4 g of dicyandiamide was placed on the upstream side. The final catalyst was achieved after the sample was treated at 550 °C for 2 h with a heating rate

of 5 °C min<sup>-1</sup> under Ar atmosphere. For comparison, the catalysts that were treated at 500, 550 and 600 °C were named as Ni–MoN@NF500, Ni–MoN@NF550 and Ni–MoN@NF600, respectively. To study the influence of the amount of dicyandiamide on the performance of the catalyst, 0.1, 0.2, 0.3, 0.4, 0.5 and 0.6 g of dicyandiamide were used, respectively, under the same condition. The prepared target catalysts were called as Ni–MoN@NF0.1, Ni–MoN@NF0.2, Ni–MoN@NF0.3, Ni–MoN@NF0.4, Ni–MoN@NF0.5 and Ni–MoN@NF0.6, respectively.

### 3. Synthesis of MoN@NF

The MoN@NF sample was achieved by immersing the Ni–MoN@NF composite in 3 M HCl to remove metal Ni.

### 4. Synthesis of NiMo–H@NF

Three pieces of the obtained NiMoO<sub>4</sub>@NF were placed in a tube furnace. The final NiMo–H@NF nanorods were obtained after the sample was treated at 550 °C for 2 h with a heating rate of 5 °C min<sup>-1</sup> under 5% H<sub>2</sub>/Ar atmosphere.

### 5. Physical Characterization

Powder X-ray diffraction (PXRD) patterns were determined on MiniFlex600-C X-ray diffractometer. The microstructure and morphology were analyzed by Field emission scanning electron microscopy (FESEM, FEI Tecnai F-20) and high-resolution transmission electron microscopy (HR-TEM, Hillsboro, OR, USA). X-ray photoelectron spectrometer (Thermo ESCALAB 250) was utilized to analyze the surface elemental composition and valence bond structure.

### 6. Electrochemical measurements

The HER performance of the electrocatalysts was tested with a typical three-electrode system in 1 M KOH by using an electrochemical workstation (CHI760E, China). A piece of sample with an area of 0.5 × 0.5 cm<sup>2</sup> was directly used as the working electrode. For comparative purposes, 3 mg of commercially available 20 wt% Pt/C was bonded on the same area of NF by using Nafion. A saturated Hg/HgO electrode and a

graphite rod were used as the reference and counter electrodes, respectively. The potential referred in this work was converted according to the equation  $E_{\text{RHE}} = E_{\text{Hg/HgO}} + 0.098 + 0.059 \times \text{pH}$ . The linear sweep voltammetry (LSV) was tested from 0 to  $-0.4$  V vs. RHE with  $5 \text{ mV s}^{-1}$ . Tafel curves were calculated from LSV. Electrochemical impedance spectroscopy (EIS) was implemented from 100 kHz to 100 mHz with AC amplitude of 5 mV. The long-term cycling test was conducted for 2000 times at the potentials between 0.1 and 0.3 V vs. RHE with  $50 \text{ mV s}^{-1}$  and the V-t curve was also collected at a controlled current density of  $-10 \text{ mA cm}^{-2}$  for 100 h.

The electrochemically capacitance ( $C_{\text{dl}}$ ) and the Electrochemically Active Surface Area ( $A_{\text{ECSA}}$ ) are linearly proportional. Therefore, the  $A_{\text{ECSA}}$  can be estimated by the  $C_{\text{dl}}$ , which can be easily conducted by cyclic voltammograms in the region of 0.02 to 0.13 V at various scan rates (10, 20, 30, 40, 50, 60, 70, 80, 90 and  $100 \text{ mV s}^{-1}$ ). The capacitance was calculated in a potential where no faradic processes were observed, *i.e.*, at 0.05 V vs. RHE. And the slope of the  $\Delta j$  vs. scan rate curve is twice that of the  $C_{\text{dl}}$ . According to the previous report, it is suitable that using a  $40 \text{ } \mu\text{F cm}^{-2}$  as the specific capacitance value. Thus, the  $A_{\text{ECSA}}$  can be reckoned by the following formula<sup>[1]</sup>:

$$A_{\text{ECSA}} = \frac{C_{\text{dl}}}{40 \text{ } \mu\text{F cm}^{-2}} * A_{\text{geo}}$$

where  $A_{\text{ECSA}}$  is the electrochemically active surface area, and  $A_{\text{geo}}$  is the geometric area of electrode.

The TOF values of the catalysts were calculated from the equation:

$$\text{TOF} = (J \times A) / (2 \times F \times n)$$

where J is the current density at a given overpotential, A is the surface area of the NF, F is the Faraday constant ( $96,485 \text{ C mol}^{-1}$ ), and n is the number of moles of the active sites of the catalyst deposited on the electrode.

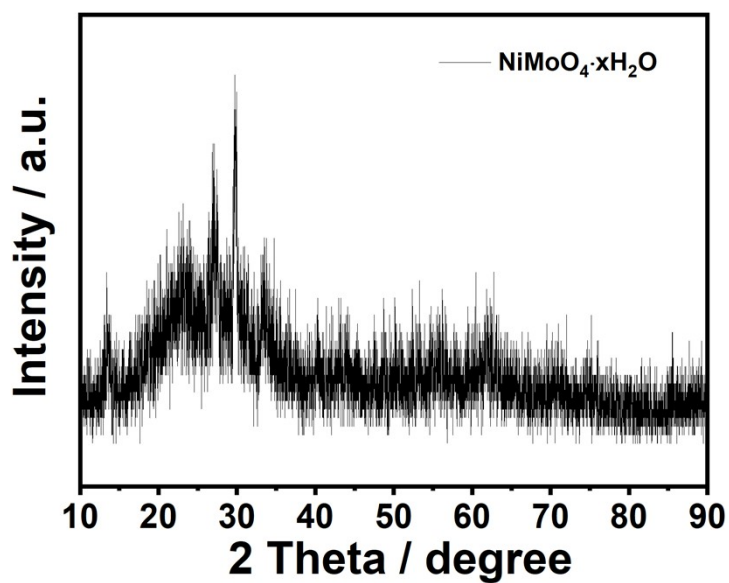

Figure S1. (a) XRD pattern of NiMoO<sub>4</sub> nanorods.

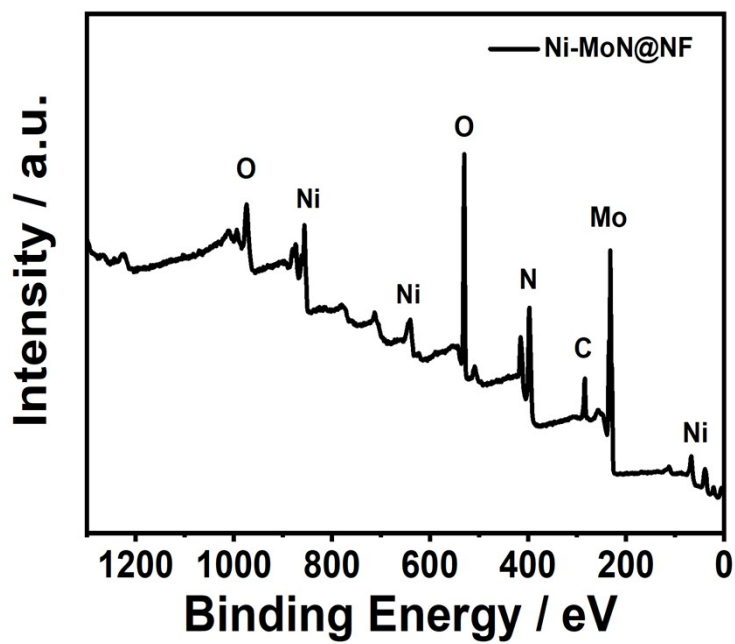

Figure S2. XPS full scan spectroscopy of Ni-MoN@NF.

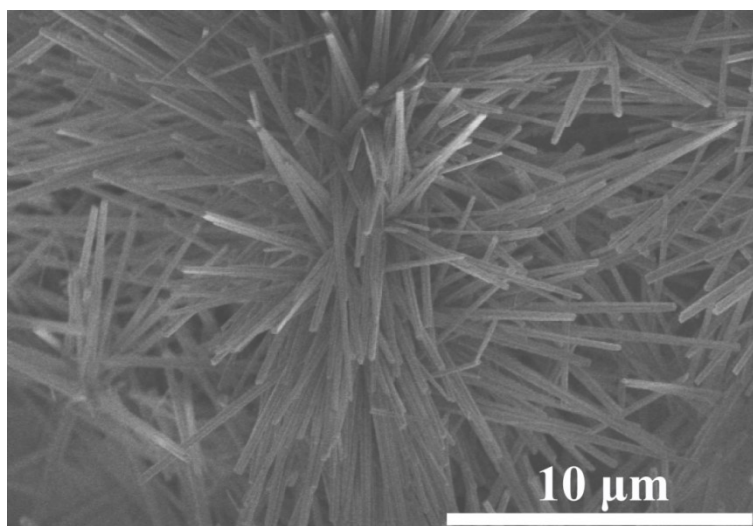

**Figure S3.** SEM images of NiMoO<sub>4</sub> nanorods.

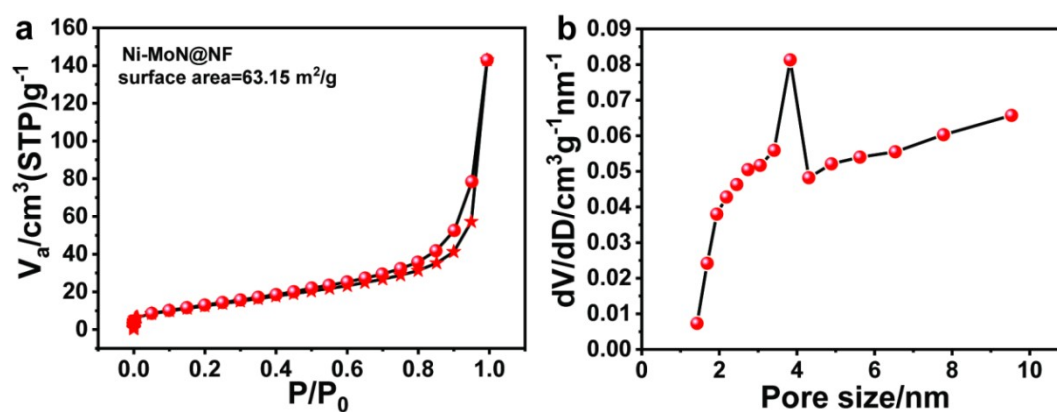

**Figure S4.** (a) N<sub>2</sub> adsorption-desorption isotherms and (b) BJH pore size distribution of Ni-MoN.

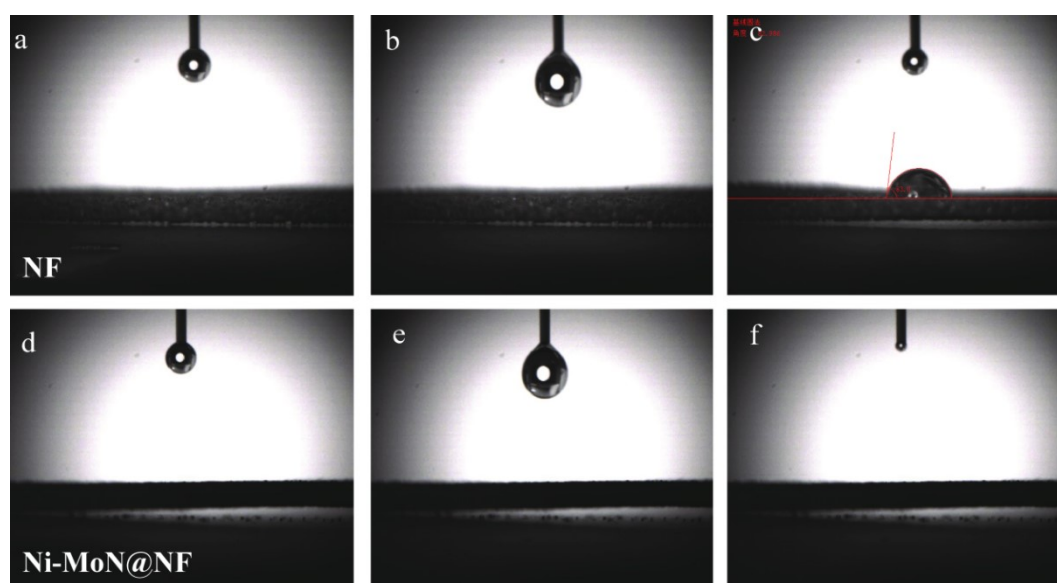

**Figure S5.** Examples of droplets for DI-water on (a-c) NF and (d-f) Ni-MoN@NF.

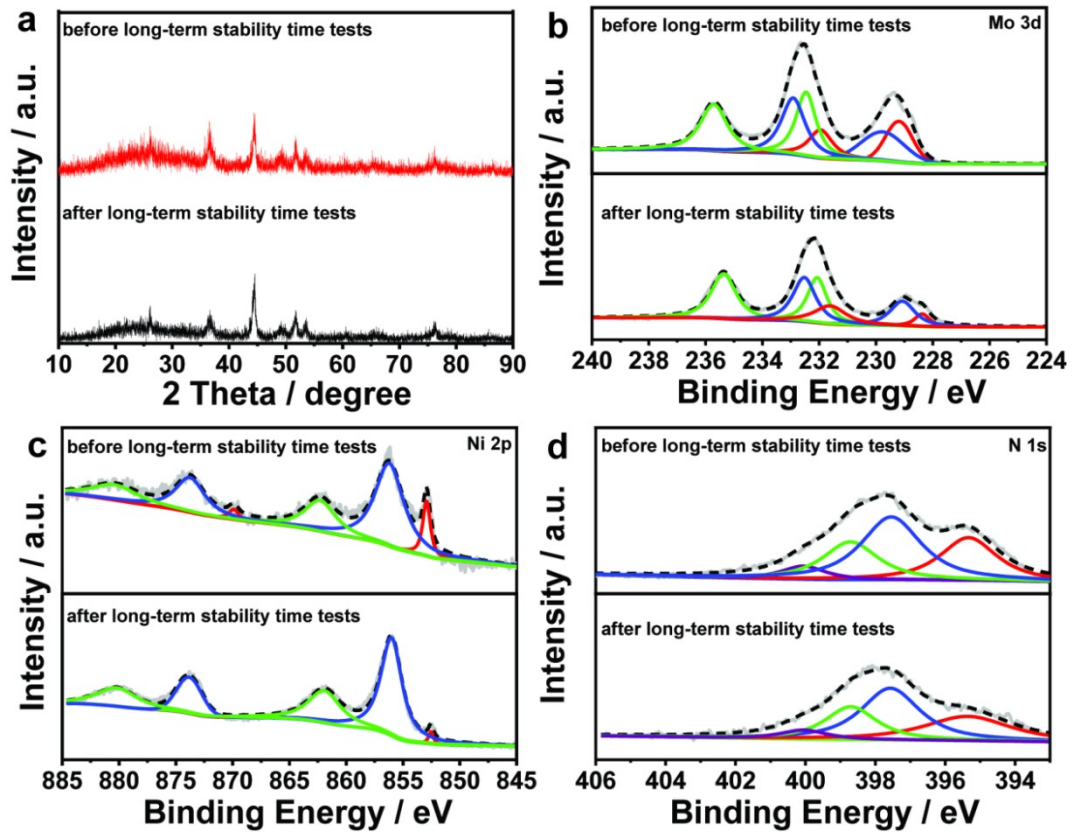

**Figure S6.** (a) XRD patterns of Ni-MoN@NF; High-resolution XPS spectra of Ni-MoN@NF (b) Mo 3d, (c) Ni 2p and (d) N 1s.

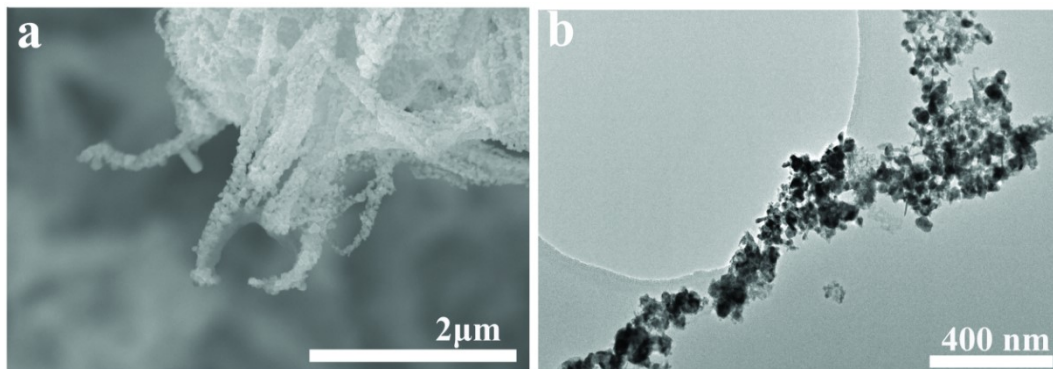

**Figure S7.** (a) SEM and (b) TEM images of Ni-MoN@NF after long-term stability time test.

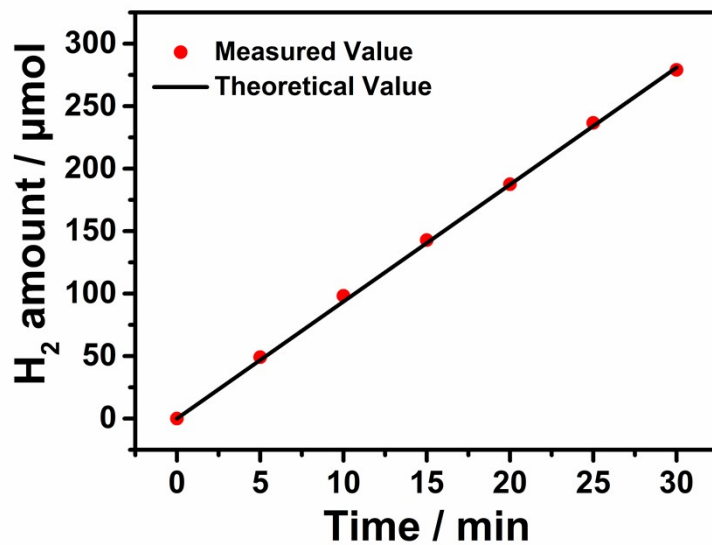

**Figure S8.** Comparison between theoretical calculation and experimental measurement of  $\text{H}_2$  evolution, indicating an up to 100% FE for  $\text{H}_2$  production on Ni–MoN@NF catalysts.

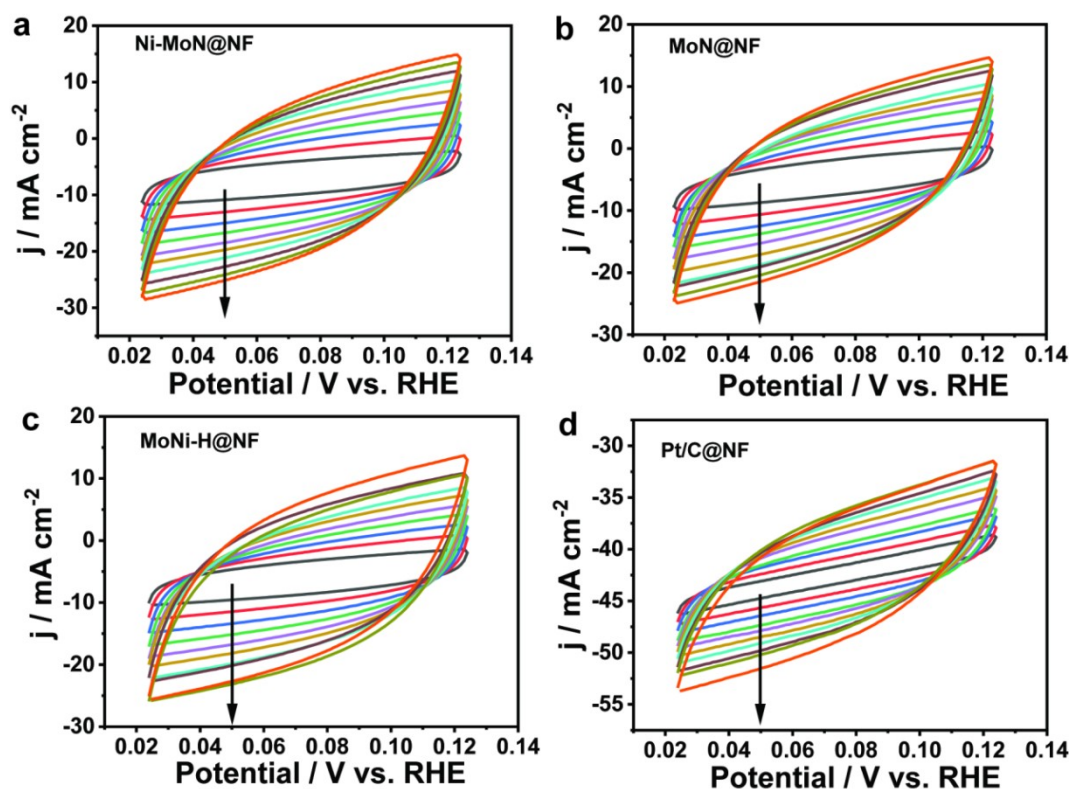

**Figure S9.** CVs with different rates from 10 to 100  $\text{mV s}^{-1}$  in the region of 0.02-0.13 V for (a) Ni–MoN@NF, (b) MoN@NF, (c) MoNi–H@NF and (d) Pt/C@NF in 1 M KOH.

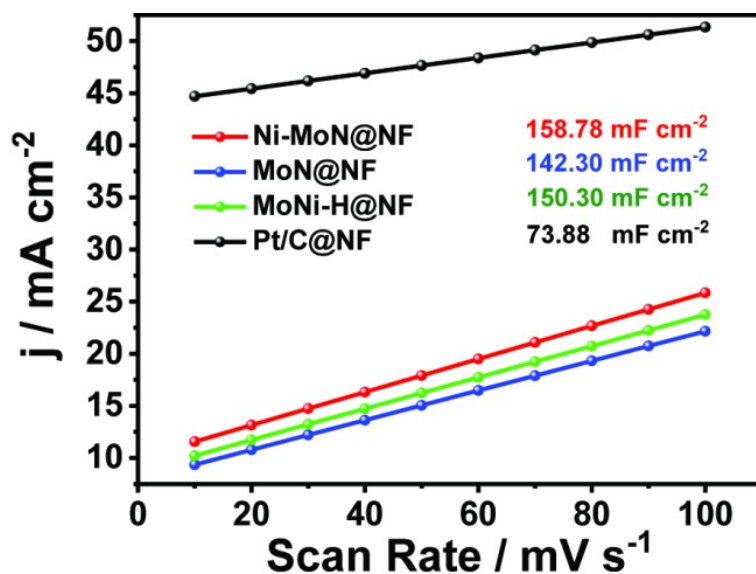

**Figure S10.** Double layer capacitance ( $C_{dl}$ ) of Ni-MoN@NF, MoN@NF, MoNi-H@NF, and Pt/C@NF.

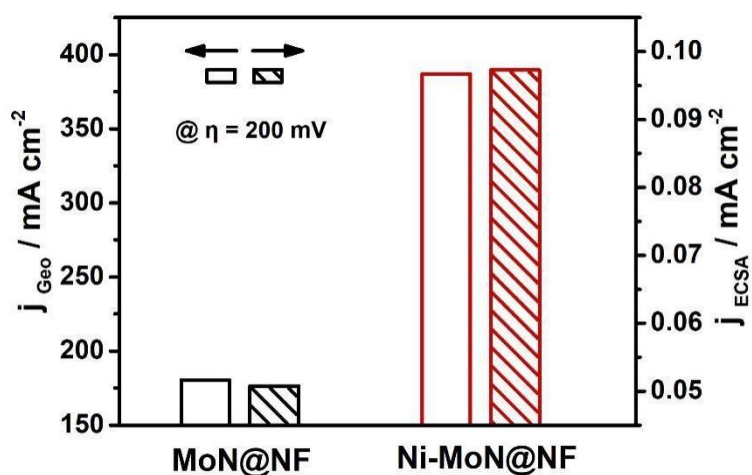

**Figure S11.** Comparison of the geometrical area and electrochemical active surface area (ECSA)-normalized specific activities of Ni-MoN@NF and MoN@NF, (evaluated at an overpotential of 200 mV).



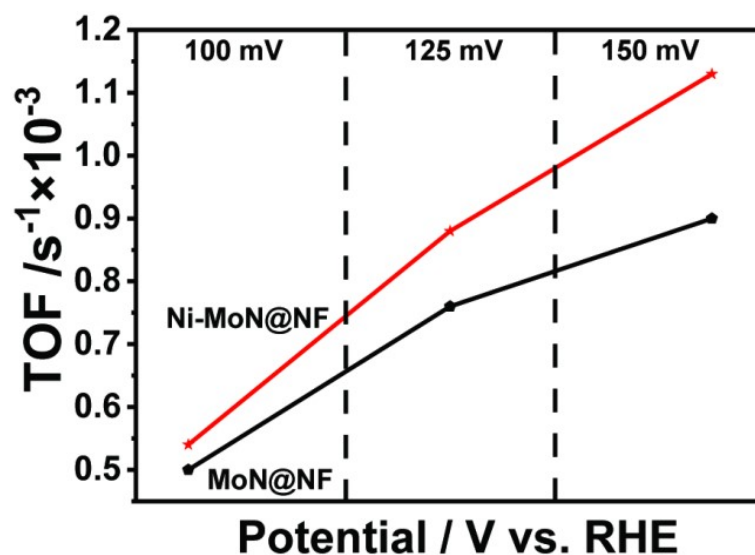

**Figure S12** Turnover Frequencies of the resulting Ni-MoN@NF and MoN@NF at various current densities.

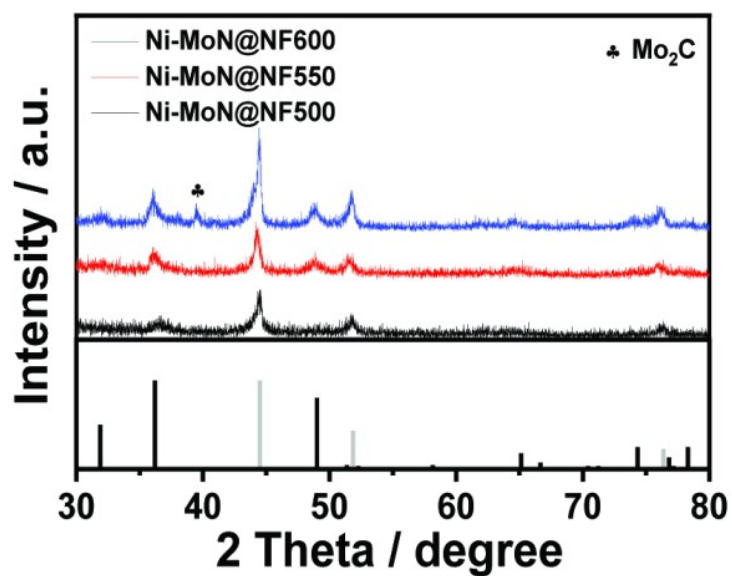

**Figure S13.** XRD patterns of Ni-MoN@NF500, Ni-MoN@NF550 and Ni-MoN@NF600.

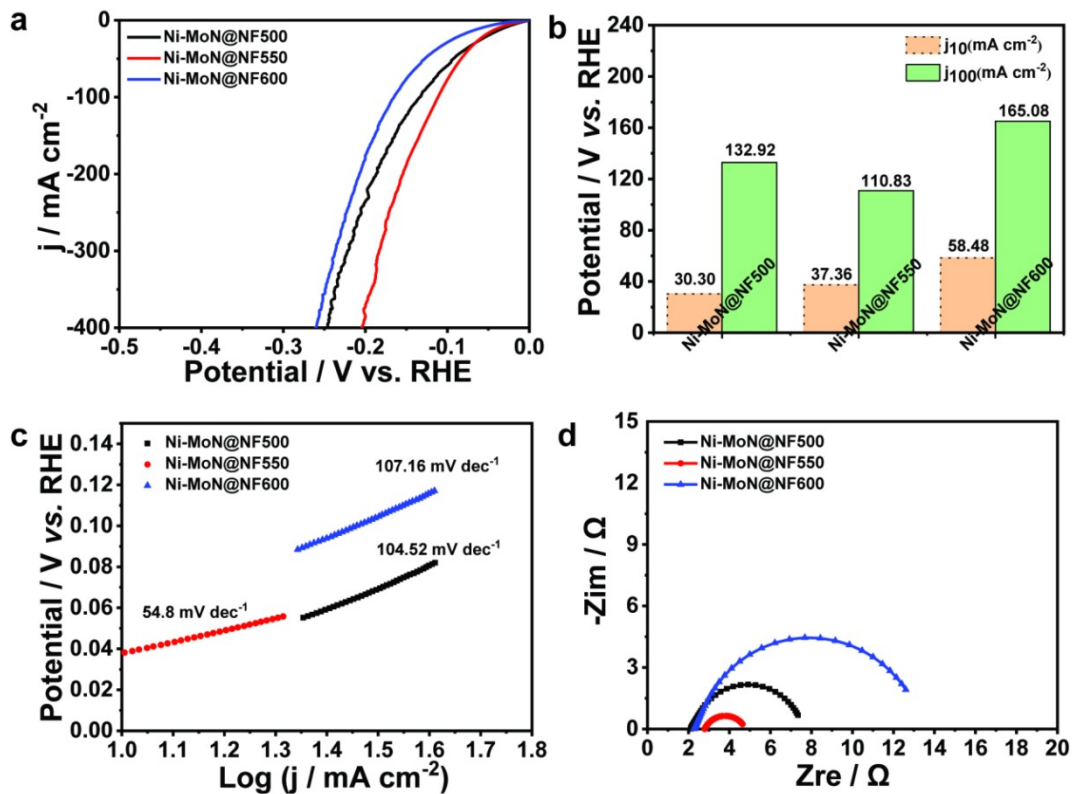

**Figure S14.** (a) Polarization curves; (b) histogram of overpotentials at 10 and 100 mA cm<sup>-2</sup> for Ni-MoN@NF500, Ni-MoN@NF550, Ni-MoN@NF600 substrate measured in 1 M KOH; (c) corresponding Tafel plots; (d) electrochemical impedance spectra of Ni-MoN@NF500, Ni-MoN@NF550, Ni-MoN@NF600.

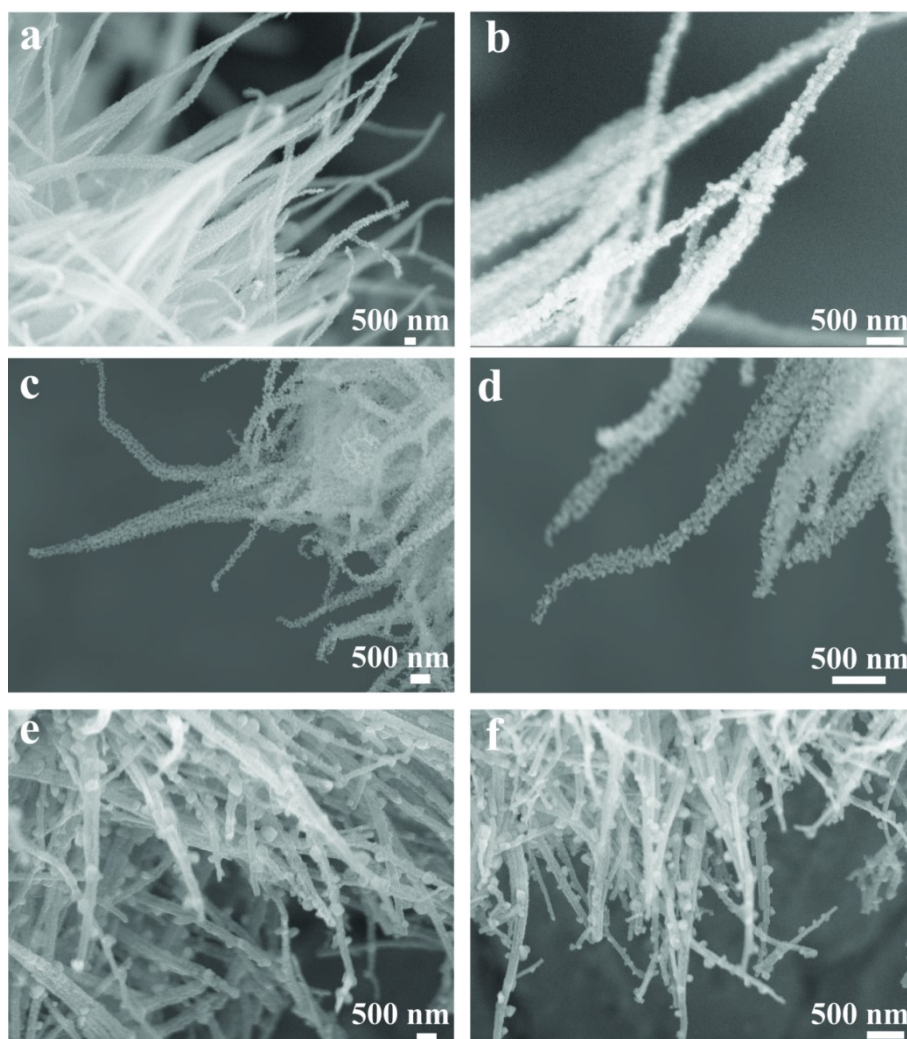

**Figure S15.** (a-b) SEM images of Ni-MoN@NF500; (c-d) SEM images of Ni-MoN@NF550; (e-f) SEM images of Ni-MoN@NF600.

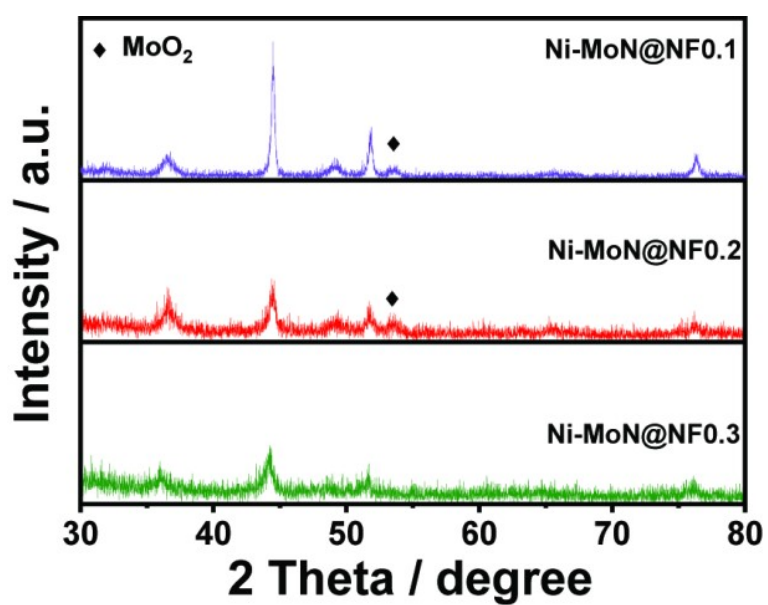

**Figure S16.** XRD patterns of Ni-MoN@NF0.1, Ni-MoN@NF0.2 and Ni-MoN@NF0.3.

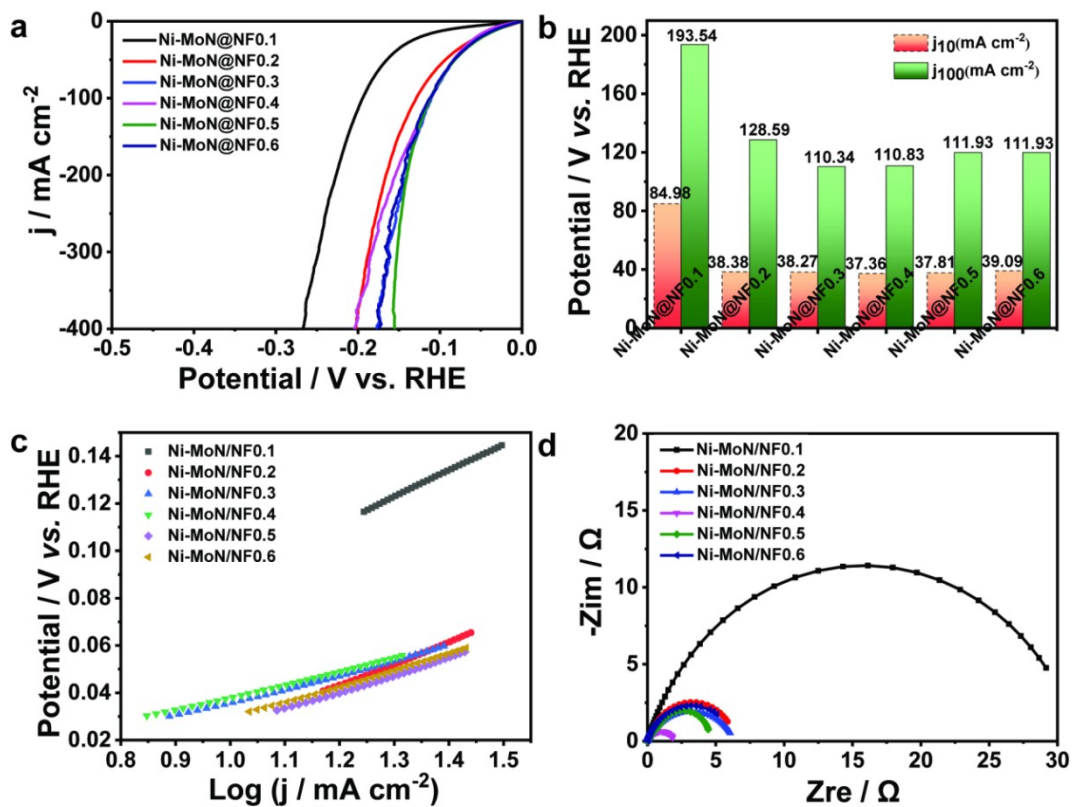

**Figure S17.** (a) Polarization curves; (b) histogram of overpotentials at 10 and 100 mA cm<sup>-2</sup> for Ni-MoN@NF0.1–Ni-MoN@NF0.6; (c) corresponding Tafel plots; (d) electrochemical impedance spectra of Ni-MoN@NF0.1–Ni-MoN@NF0.6.

**Table S1.** Summary of state-of-the-art electrocatalysts in KOH for HER

| Catalyst                                                                | Support       | Electrolyte         | $\eta_{10}$ [mV] | Tafel slope<br>[mV dec <sup>-1</sup> ] | Reference                                    |
|-------------------------------------------------------------------------|---------------|---------------------|------------------|----------------------------------------|----------------------------------------------|
| Ni-MoN@NF                                                               | Ni foam       | 1 M KOH             | 37.36            | 57.6                                   | This work                                    |
| Ni-Ni <sub>0.2</sub> Mo <sub>0.8</sub> N                                | Ni foam       | 1 M KOH             | 15               | 39                                     | ACS Appl. Mater. Interfaces, 2018, 10, 30400 |
| Ni <sub>3</sub> N-Ni <sub>0.2</sub> Mo <sub>0.8</sub> N sheets          | C foam        | 1 M KOH             | 31               | 64                                     | Nano Energy, 2018, 44, 353                   |
| Ni-Ni <sub>0.2</sub> Mo <sub>0.8</sub> N particles                      | Glassy carbon | 1 M KOH             | 38               | 40                                     | Nano Energy, 2016, 22, 111                   |
| Ni/Ni <sub>2</sub> P/Mo <sub>2</sub> C@C                                | Glassy carbon | 1 M KOH             | 223              | 68                                     | J. Mater. Chem. A, 2018, 6, 5789             |
| Ni-Mo <sub>2</sub> C-CNF                                                | Glassy carbon | 1 M KOH             | 197              | 54.7                                   | J. Colloid Interface Sci., 2020, 558, 100    |
| MoS <sub>2</sub> -Ni <sub>3</sub> S <sub>2</sub> HNRs                   | Ni foam       | 1 M KOH             | 98               | 61                                     | ACS Catal., 2017, 7, 2357                    |
| Co <sub>2</sub> P/Mo <sub>3</sub> Co <sub>3</sub> C/Mo <sub>2</sub> C@C | Glassy carbon | 1 M KOH             | 182              | 65                                     | J. Mater. Chem. A, 2018, 6, 5789             |
| Ni <sub>3</sub> N@VN                                                    | Ni foam       | 1 M KOH             | 56               | 47                                     | J. Mater. Chem. A, 2019, 7, 5513             |
| Ni <sub>3</sub> N-VN                                                    | Ni foam       | 1 M KOH             | 64               | 37                                     | Adv. Mater., 2019, 31, 1901174               |
| NiMoN/NF-450                                                            | Ni foam       | 1 M KOH             | 22               | 101                                    | J. Mater. Chem. A, 2018, 6, 8479             |
| Ni-SN@C                                                                 | Membrane      | 1 M KOH<br>seawater | 23               | 39                                     | Adv. Mater., 2021, 2007508                   |

[1] .Sun J, Liu J, Chen H, Han X, Wu Y, He J, et al. Strongly Coupled Mo<sub>2</sub>C and Ni Nanoparticles with *in-situ* Formed Interfaces Encapsulated by Porous Carbon Nanofibers for Efficient Hydrogen Evolution Reaction under Alkaline Conditions[J]. Journal of Colloid and Interface Science. 2020;558:100-105.

[2] . Yu Z-Y, Duan Y, Gao M-R, Lang C-C, Zheng Y-R, Yu S-H. A One-Dimensional Porous Carbon-Supported Ni/Mo<sub>2</sub>C Dual Catalyst for Efficient Water Splitting[J]. Chemical Science. 2017;8(2):968-973.
